# Supplementary material for: A series of M3PS4 (M = Ag, Cu and Ag/Cu) thiophosphates with diamond-like structures exhibiting large second harmonic generation responses and moderate ion conductivities
Source: Royal Society of Chemistry journal article supplement (doi:10.1039/d1dt00366f), 2021-01-01
Supplement: d1dt00366f1.pdf [file d1dt00366f1.pdf]

**Series of  $M_3PS_4$  ( $M = Ag, Cu$  and  $Ag/Cu$ ) thiophosphates with diamond-like structures exhibiting large second harmonic generation responses and moderate ion conductivities**

Ya Yang,<sup>a</sup> Bingbing Zhang,<sup>a</sup> Xiaowen Wu<sup>a,b,\*</sup> and Kui Wu<sup>a,\*</sup>

*<sup>a</sup>Key laboratory of Medicinal Chemistry and Molecular Diagnosis of the Ministry of Education, Key Laboratory of Analytical Science and Technology of Hebei province, College of Chemistry and environmental Science, Hebei University, Baoding 071002, China.*

*<sup>b</sup>College of Chemistry and Chemical Engineering, Xinjiang Normal University, Urumqi, China*

*To whom correspondence should be addressed:*

*E-mail: wukui@hbu.edu.cn (Kui Wu)*

## **CONTENTS**

1. Synthesis of Title Compounds
2. Structural Refinement and Crystal Data
3. Property Characterization
4. Tables and Figures
5. Reference

## 1. Synthesis of Title Compounds

All of the raw materials including S powder (99.99%), P powder (99.9%), Cu<sub>2</sub>S powder (99.9%), Cu powder (99.9%) and Ag block (99.9%) were purchased from the Beijing Hawk Science & Technology Co., Ltd. The crystals of Ag<sub>3</sub>PS<sub>4</sub> and Cu<sub>3</sub>PS<sub>4</sub> were synthesised by stoichiometric ratio (Ag:P:S=3:1:4 for Ag<sub>3</sub>PS<sub>4</sub>, Cu<sub>2</sub>S:P:S=1.5:1:2.5 for Cu<sub>3</sub>PS<sub>4</sub>), but the Ag<sub>1.5</sub>Cu<sub>1.5</sub>PS<sub>4</sub> crystal was synthesised by non-stoichiometric ratio (Ag:Cu:P:S=1:2:1:4). Raw mixtures including were firstly loaded into the graphite crucibles and then put them into silica tubes. Using the flame gun and air extractor, silica tubes were carefully vacuum-sealed with the internal vacuum degree ( $\sim 10^{-3}$  Pa) in ampoules. Muffle furnace was used to complete the crystallization reaction and the setting temperature process was shown as following: firstly heated them from room temperature to 400 °C with 40 °C/h and kept this temperature for 10 h; then raised to 750 °C in 10 h and kept this high temperature for 5 days; finally, downed to the 400 °C with 5 °C/h and naturally cooled the room temperature before turning off the muffle furnace. The yellow crystals of Ag<sub>3</sub>PS<sub>4</sub>, Cu<sub>3</sub>PS<sub>4</sub> and Ag<sub>1.5</sub>Cu<sub>1.5</sub>PS<sub>4</sub> were found in the tubes after washed with N, N-dimethylformamide (DMF) solvent and they are stable in the air within several months.

## 2. Structure Refinement and Crystal data

Selected high-quality crystals were used for data collections on a Bruker SMART APEX II 4K CCD diffractometer using Mo K $\alpha$  radiation ( $\lambda = 0.71073$  Å) at 296 K. The crystal structures were solved by direct method and refined using the SHELXTL program package.<sup>[1]</sup> Multi-scan method was used for absorption correction.<sup>[2]</sup> Rational anisotropic thermal parameters for all atoms were obtained by the anisotropic refinement and extinction correction. PLATON was also used to check the final structures and no other symmetries were found. Detail refinement parameters and data were shown in Table S1.

## 3. Property Characterization

### 3.1 Powder X-ray Diffraction

Powder X-ray diffraction (XRD) of title compounds were ground and collected on a Dandong Haoyuan DX-27mini with Cu K $\alpha$  radiation ( $\lambda = 1.5418$  Å) at room temperature. The 2 $\theta$  range was 10-70° with a step size of 0.02° and a fixed counting time of 1s/step.

### 3.2 UV-Vis-Near-IR (NIR) Diffuse-Reflectance Spectra

Optical Diffuse-reflectance spectra were measured by a Shimadzu SolidSpec-3700DUV spectrophotometer in the wavelength range of 200–1100 nm at room temperature, and using the BaSO<sub>4</sub> for baseline correction.

### 3.3 Raman Spectra

Hand-picked crystals were firstly put on an object slide, and then a LABRAM HR Evolution spectrometer equipped with a CCD detector by a 532 nm laser was used to record the Raman spectra. The integration time was set to be 5 s.

### 3.4 Second-Harmonic Generation Measurement

Powder SHG responses of title compounds were investigated by a Q-switch 2.09 μm laser (3 Hz, 50 ns) at 38-55, 55-88, 88-105, 105-150, 150-200 and 200-250 μm particle size. The AgGaS<sub>2</sub> (as the reference) crystal was ground and sieved into the same size range to a distinct measure.

### 3.5 Conductivity Measurements

The electrochemical impedance spectra (EIS) of title compounds have measured by an electrochemical workstation (Biologic, VSP) and the frequency ranged from 1MHz to 1Hz. Powder sample of three compounds were pelleted with a thickness of approximate 1mm and a diameter of 13mm under 20 ton of pressure. Then taking these pellets into air oven about 3-5 h after covering silver paste. The temperature-dependent AC impedance spectra for title compounds were studied at different temperature from 10 to 80°C with an increment of 5 or 10 °C. The ionic conductivity was obtained through the equation  $\sigma = L/S \cdot R$ , where L is pelleted thickness, S is the area, and the total resistance R is equal to real impedance when imaginary impedance approaches zero ( $Z'' \approx 0$ ).

### 3.6 Computational Description

In order to further investigate the structure–property relationships, the electronic structures of title compounds were studied by density functional theory (DFT) based on ab initio calculations.<sup>[3]</sup> The exchange-correlation potential was calculated using Perdew–Burke–Ernzerhof (PBE) functional within the generalized gradient approximation (GGA) with the scheme.<sup>[4]</sup> The following orbital electrons were treated as valence electrons, Cu: 3p<sup>6</sup> 3d<sup>10</sup> 4s<sup>1</sup>, Ag: 4p<sup>6</sup> 4d<sup>10</sup> 5s<sup>1</sup>, P: 3s<sup>2</sup> 3p<sup>3</sup>, S: 3S<sup>2</sup> 3P<sup>4</sup>. To achieve energy convergence, a plane-wave basis set energy cutoff was 750 eV within normal-conserving pseudo-potential (NCP),<sup>[5]</sup> and the Monkhorst–Pack scheme was 3 × 3 × 2 in the Brillouin Zone (BZ) of the primitive cell are chosen. The dipole moments of the AgS<sub>4</sub>, CuS<sub>4</sub>,

PS<sub>4</sub>, and (Ag/Cu)S<sub>4</sub> units were calculated with a simple bond-valence method. Distribution of the electron on the each atom was estimated by the bond-valence theory  $v_{ij} = \exp[(r' - r_{ij})/B]$ ; where  $r'$  is the empirical constant,  $r_{ij}$  is the actual bond length, and B is commonly taken to be a universal constant equal to 0.37 Å. The geometrical position was taken from the unit cell of the experimental X-ray crystal structure. The Debye equation  $\mu = neR$ , where  $\mu$  is the net dipole moment in Debye,  $n$  is the total number of electrons,  $e$  is the charge on an electron, and  $R$  is the difference in *cm* between the “centroids” of positive and negative charges, was used to calculate the dipole moment.

#### 4. Tables and Figures

Table S1. Crystal data and structure refinement for title compounds.

Table S2. Bond Valence sum (vu) of title compounds.

Table S3. Calculated Dipole Moment (debye) of anionic groups ( $\text{MS}_4$  and  $\text{PS}_4$ ) for title compounds.

Table S4. Comparison of important performances of the title compounds and  $\text{AgGaS}_2$  (AGS) as a reference.

Table S5. The ion conductivities for title compounds at diverse temperatures.

Figure S1. One  $\text{PS}_4$  unit is surrounded by 12  $(\text{Ag/Cu})\text{S}_4$  units in  $\text{Ag}_{1.5}\text{Cu}_{1.5}\text{PS}_4$ .

Figure S2. Band structures for title compounds.

Figure S3. Partial Density of State (PDOS) and calculated birefringences for title compounds.

Figure S4. Raman spectra for title compounds.

Figure S5. Arrhenius plots, complex impedance plots and ion conductivity plots for title compounds.

**Table S1.** Crystal data and structure refinement for title compounds.

|                                                           | Ag <sub>3</sub> PS <sub>4</sub> | Cu <sub>3</sub> PS <sub>4</sub> | Ag <sub>1.5</sub> Cu <sub>1.5</sub> PS <sub>4</sub> |
|-----------------------------------------------------------|---------------------------------|---------------------------------|-----------------------------------------------------|
| Formula weight                                            | 482.82                          | 349.83                          | 416.33                                              |
| Space group                                               | <i>Pmn</i> 2 <sub>1</sub>       |                                 |                                                     |
| a (Å)                                                     | 7.6383(13)                      | 7.2889(16)                      | 7.718(7)                                            |
| b (Å)                                                     | 6.8528(11)                      | 6.3341(14)                      | 6.542(6)                                            |
| c (Å)                                                     | 6.4976(11)                      | 6.0828(14)                      | 6.318(6)                                            |
| V (Å <sup>3</sup> )                                       | 340.11(10)                      | 280.45(11)                      | 320.0(5)                                            |
| Z                                                         | 2                               | 2                               | 2                                                   |
| D <sub>c</sub> (g/cm <sup>3</sup> ) (calculated density)  | 4.715                           | 4.143                           | 4.321                                               |
| μ(mm <sup>-1</sup> ) (absorption coefficient)             | 9.890                           | 12.892                          | 10.906                                              |
| goodness-of-fit on F <sup>2</sup>                         | 1.099                           | 0.954                           | 1.100                                               |
| R <sub>1</sub> , wR <sub>2</sub> (I > 2σ(I)) <sup>a</sup> | 0.0260, 0.0430                  | 0.0144, 0.0347                  | 0.0375, 0.0729                                      |
| R <sub>1</sub> , wR <sub>2</sub> (all data)               | 0.0298, 0.0441                  | 0.0147, 0.0349                  | 0.0411, 0.0744                                      |
| absolute structure parameter                              | 0.11(10)                        | 0.036(19)                       | 0.06(10)                                            |
| largest diff. peak and hole (e·Å <sup>-3</sup> )          | 0.938, -1.034                   | 0.342, -0.289                   | 1.009, -1.043                                       |

<sup>[a]</sup>R<sub>1</sub>=F<sub>O</sub>-F<sub>C</sub>/F<sub>O</sub> and wR<sub>2</sub>=[w(F<sub>O</sub><sup>2</sup>-F<sub>C</sub><sup>2</sup>)]<sup>2</sup>/wF<sub>O</sub><sup>4</sup>]<sup>1/2</sup>

**Table S2.** Bond Valence sum ( $\nu$ ) of title compounds.

| Compounds                                           | M <sup>1+</sup> | P <sup>5+</sup> | S <sup>2-</sup> |
|-----------------------------------------------------|-----------------|-----------------|-----------------|
| Ag <sub>3</sub> PS <sub>4</sub>                     | 1.163-1.259     | 5.174           | 2.174-2.243     |
| Cu <sub>3</sub> PS <sub>4</sub>                     | 1.102-1.196     | 4.893           | 2.059-2.139     |
| Ag <sub>1.5</sub> Cu <sub>1.5</sub> PS <sub>4</sub> | 0.829-1.267     | 4.882           | 1.976-2.162     |

**Table S3.** Calculated Dipole Moment (debye) of anionic groups (MS<sub>4</sub> and PS<sub>4</sub>) for title compounds.

| Ag <sub>3</sub> PS <sub>4</sub>                     |          |          |          |                       |
|-----------------------------------------------------|----------|----------|----------|-----------------------|
| Group                                               | <i>x</i> | <i>y</i> | <i>z</i> | dipole moment (Debye) |
| AgS <sub>4</sub>                                    | 0        | 0.47     | -2.07    | 2.12                  |
| PS <sub>4</sub>                                     | 0        | 1.71     | -1.49    | 2.13                  |
| Total                                               | 0        | 2.186    | -3.56    | 4.18                  |
| Cu <sub>3</sub> PS <sub>4</sub>                     |          |          |          |                       |
| CuS <sub>4</sub>                                    | -0.04    | -2.36    | 3.87     | 4.53                  |
| PS <sub>4</sub>                                     | 0        | -0.77    | 0.40     | 0.87                  |
| Total                                               | -0.04    | -3.13    | 4.27     | 5.29                  |
| Ag <sub>1.5</sub> Cu <sub>1.5</sub> PS <sub>4</sub> |          |          |          |                       |
| (Ag/Cu)S <sub>4</sub>                               | 0        | 0.34     | -2.11    | 2.14                  |
| PS <sub>4</sub>                                     | 0        | 5.14     | -2.69    | 5.80                  |
| Total                                               | 0        | 5.49     | -4.80    | 7.29                  |

**Table S4.** Comparison of important performance of the title compounds and AgGaS<sub>2</sub> (AGS) as a reference.

| Compounds                                                 | Ag <sub>3</sub> PS <sub>4</sub> | Cu <sub>3</sub> PS <sub>4</sub> | Ag <sub>1.5</sub> Cu <sub>1.5</sub> PS <sub>4</sub> | AgGaS <sub>2</sub>    |
|-----------------------------------------------------------|---------------------------------|---------------------------------|-----------------------------------------------------|-----------------------|
| Space group                                               | <i>Pmn</i> 2 <sub>1</sub>       |                                 |                                                     | <i>I</i> -42 <i>d</i> |
| Band gap (exp./cal.) (eV)                                 | 2.43/1.14                       | 2.25/1.46                       | 2.37/1.28                                           | 2.64                  |
| SHG response (×AGS)                                       | 1.3                             | 0.5                             | 0.8                                                 | 1.0                   |
| Calculated NLO coefficient $d_{ij}$ (pm V <sup>-1</sup> ) | 15.77                           | -10.1                           | 13.42                                               | 13.9                  |
| Birefringence ( $\Delta n$ )                              | 0.065                           | 0.07                            | 0.064                                               | 0.039                 |

**Table S5.** The ion conductivities for title compounds at diverse temperatures.

| <div>Compounds</div> <div><math>\sigma_T(\text{S/cm})</math></div> | $\text{Ag}_3\text{PS}_4$      | $\text{Cu}_3\text{PS}_4$      | $\text{Ag}_{1.5}\text{Cu}_{1.5}\text{PS}_4$ |
|--------------------------------------------------------------------|-------------------------------|-------------------------------|---------------------------------------------|
| 10°C                                                               | $1.647 \times 10^{-7}$        | $1.882 \times 10^{-6}$        | $2.766 \times 10^{-7}$                      |
| 20/25°C                                                            | $2.946 \times 10^{-7}$ (20°C) | $2.809 \times 10^{-6}$ (25°C) | $6.591 \times 10^{-7}$ (25°C)               |
| 30°C                                                               | $4.701 \times 10^{-7}$        | $3.681 \times 10^{-6}$        | $7.388 \times 10^{-7}$                      |
| 40°C                                                               | $9.017 \times 10^{-7}$        | $5.670 \times 10^{-6}$        | $1.278 \times 10^{-6}$                      |
| 50°C                                                               | $1.065 \times 10^{-6}$        | $8.276 \times 10^{-6}$        | $1.875 \times 10^{-6}$                      |
| 60°C                                                               | $1.667 \times 10^{-6}$        | $1.157 \times 10^{-5}$        | $2.801 \times 10^{-6}$                      |
| 70°C                                                               | $2.407 \times 10^{-6}$        | $1.542 \times 10^{-5}$        | $3.939 \times 10^{-6}$                      |
| 80°C                                                               | $3.416 \times 10^{-6}$        | $2.051 \times 10^{-5}$        | $5.474 \times 10^{-6}$                      |

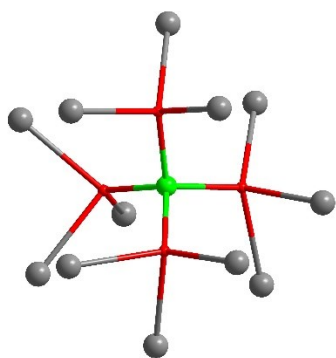

**Figure S1.** One PS<sub>4</sub> unit is surrounded by 12 (Ag/Cu)S<sub>4</sub> units in Ag<sub>1.5</sub>Cu<sub>1.5</sub>PS<sub>4</sub>.

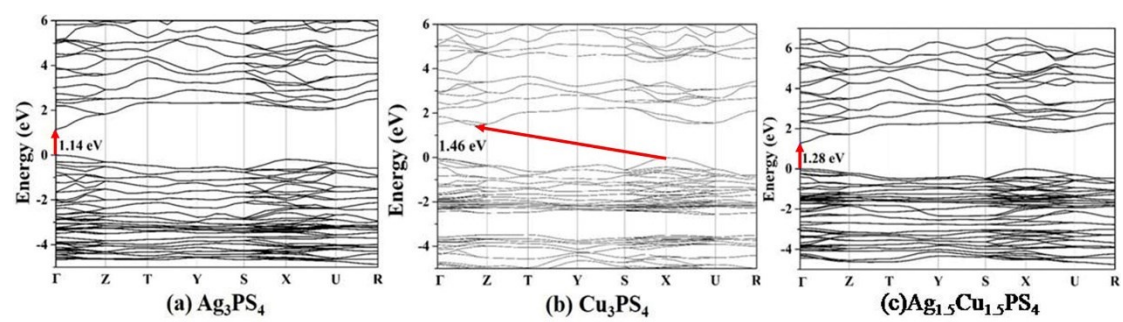

**Figure S2.** Band structures for title compounds.

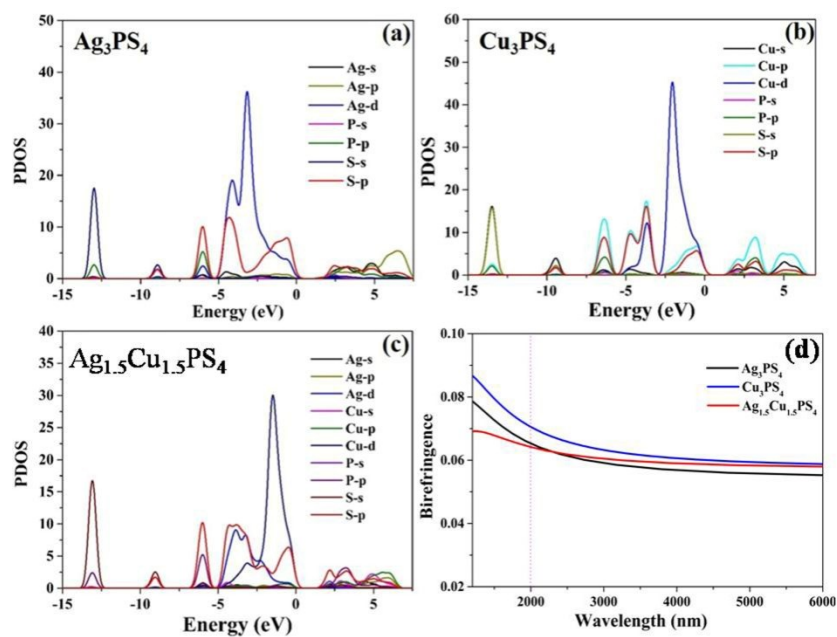

**Figure S3.** (a, b and c) Partial Density of State (PDOS) and (d) calculated birefringences for title crystals.

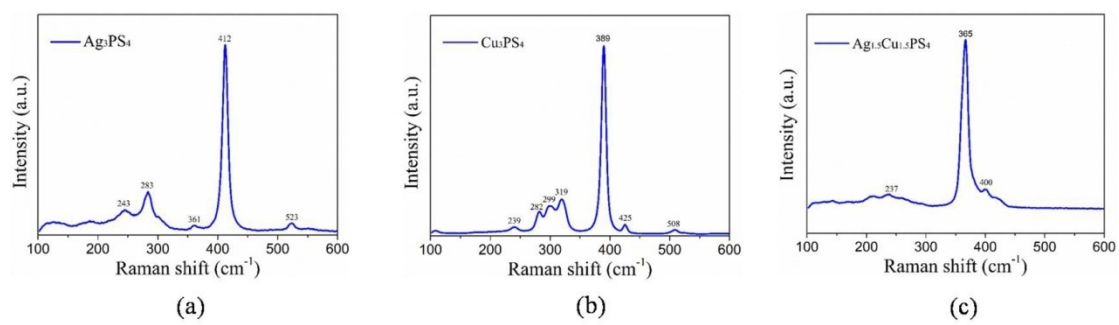

**Figure S4.** Raman spectra for title compounds.

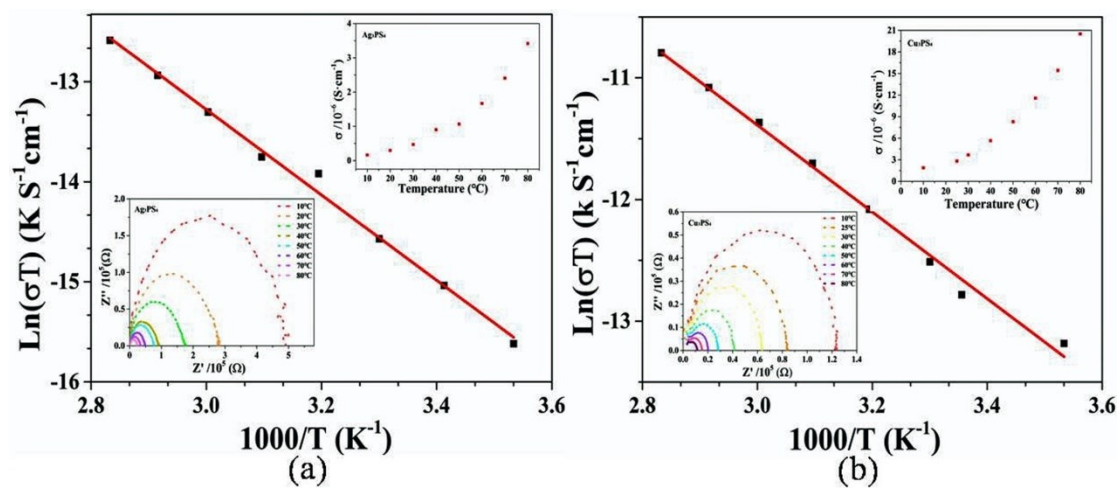

**Figure S5.** The Arrhenius plots with a linear fit all are  $R^2 = 0.993$  for (a)  $\text{Ag}_3\text{PS}_4$  and (b)  $\text{Cu}_3\text{PS}_4$ , the complex impedance plots (insets) are in the bottom left and ion conductivity plots (insets) are in the upper right from low to high temperatures.

## 5. References

- [1] SAINT, version 7.60A; Bruker Analytical X-ray Instruments, Inc.: Madison, WI, 2008.
- [2] G. M. Sheldrick, SHELXTL, version 6.14; Bruker Analytical X-ray Instruments, Inc.: Madison, WI, 2003.
- [3] S. J. Clark, M. D. Segall, C. J. Pickard, P. J. Hasnip, M. J. Probert, K. Refson and M. C. Payne, *Z. Kristallogr.*, 2005, **220**, 567.
- [4] J. P. Perdew, K. Burke and M. Ernzerhof, *Phys. Rev. Lett.*, 1996, **77**, 3865.
- [5] A. M. Rappe, K. M. Rabe, E. Kaxiras and J. D. Joannopoulos, *Phys. Rev. B*, 1990, **41**, 1227.
